# Supplementary material for: The Fast Track for Intestinal Tumor Cell Differentiation and In Vitro Intestinal Models by Inorganic Topographic Surfaces
Source: MDPI journal article supplement (doi:10.3390/pharmaceutics14010218), 2022-01-17
Supplement: s1 [file s1]

# The Fast Track for Intestinal Tumor Cell Differentiation and In Vitro Intestinal Models by Inorganic Topographic Surfaces

Matteo Centonze <sup>1</sup>, Erwin J. W. Berenschot <sup>2</sup>, Simona Serrati <sup>3</sup>, Arturo Susarrey-Arce <sup>2,\*</sup> and Silke Krol <sup>1,\*</sup>

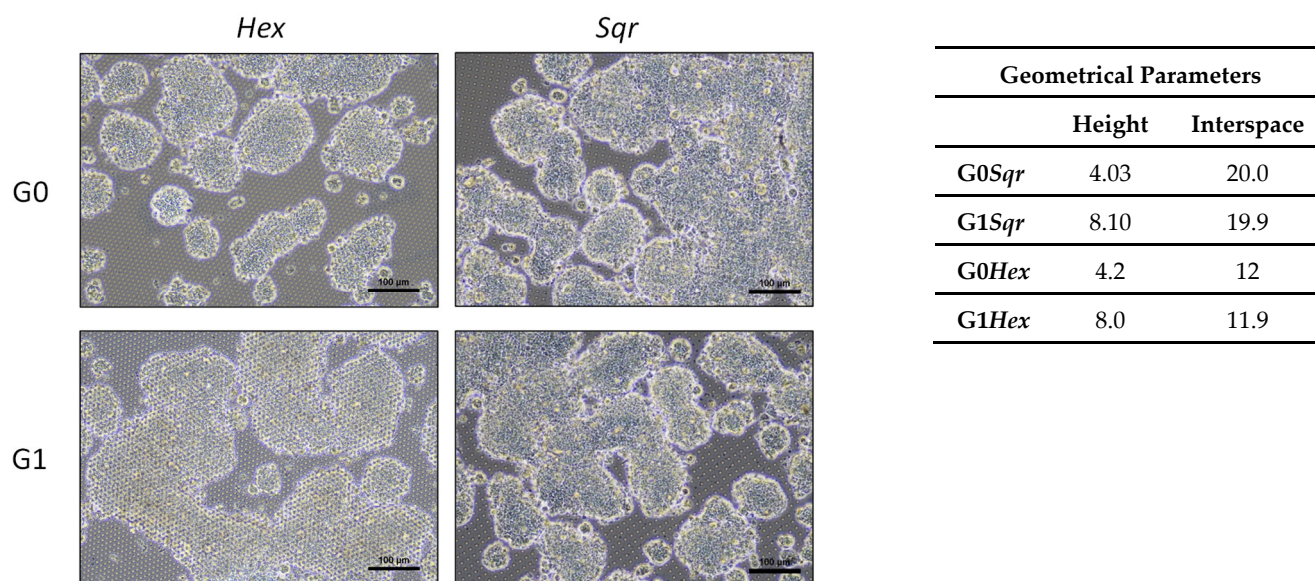

**Figure S1.** Light microscopic images comparing the cell growth of HT29 cells after 4 days on G0 and G1 with square (*Sqr*) and hexagonal (*Hex*) orientation. Scale bars are 100  $\mu\text{m}$ . The corresponding pit width and the height of the structures can be seen in the table.

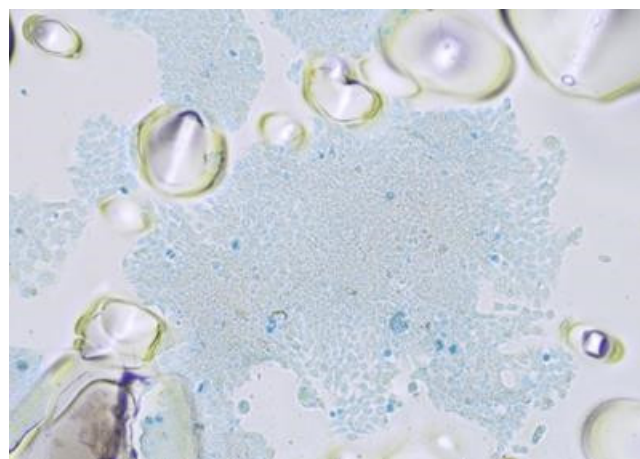

**Figure S2.** Damage on culture dish due to Methacarn fixation. Evident is the damage on the plastic surface of the 24-well plate due to chloroform interrupting the previously homogenous cell layer. Magnification: 4 $\times$ .

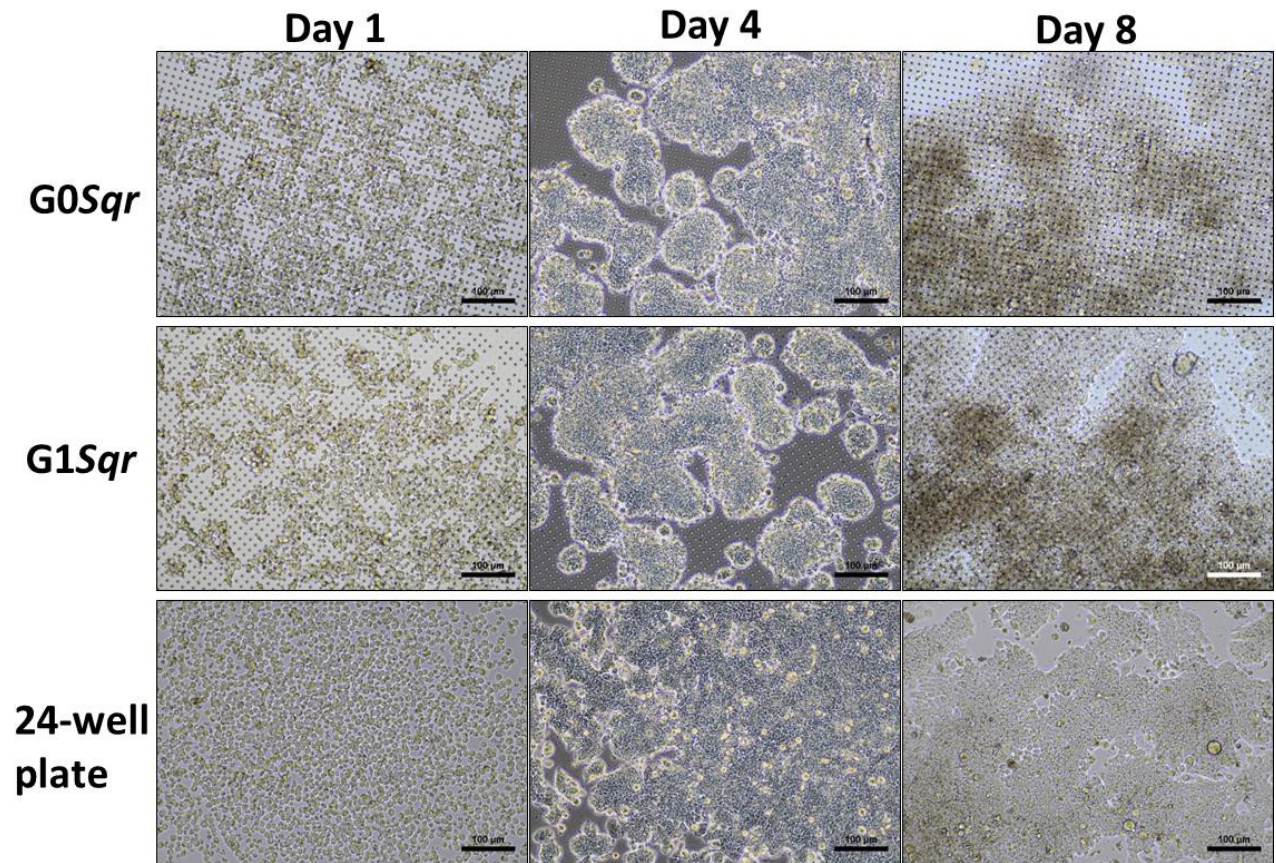

**Figure S3.** Time lapse experiment on topographic surfaces versus traditional 2D culture (24-well plate). Light microscopic images of HT29 cells seeded on G0 and G1 topographic substrates and on pre-treated 24-well plates at day 1, 4 and 8. Scale bars: 100  $\mu\text{m}$ .



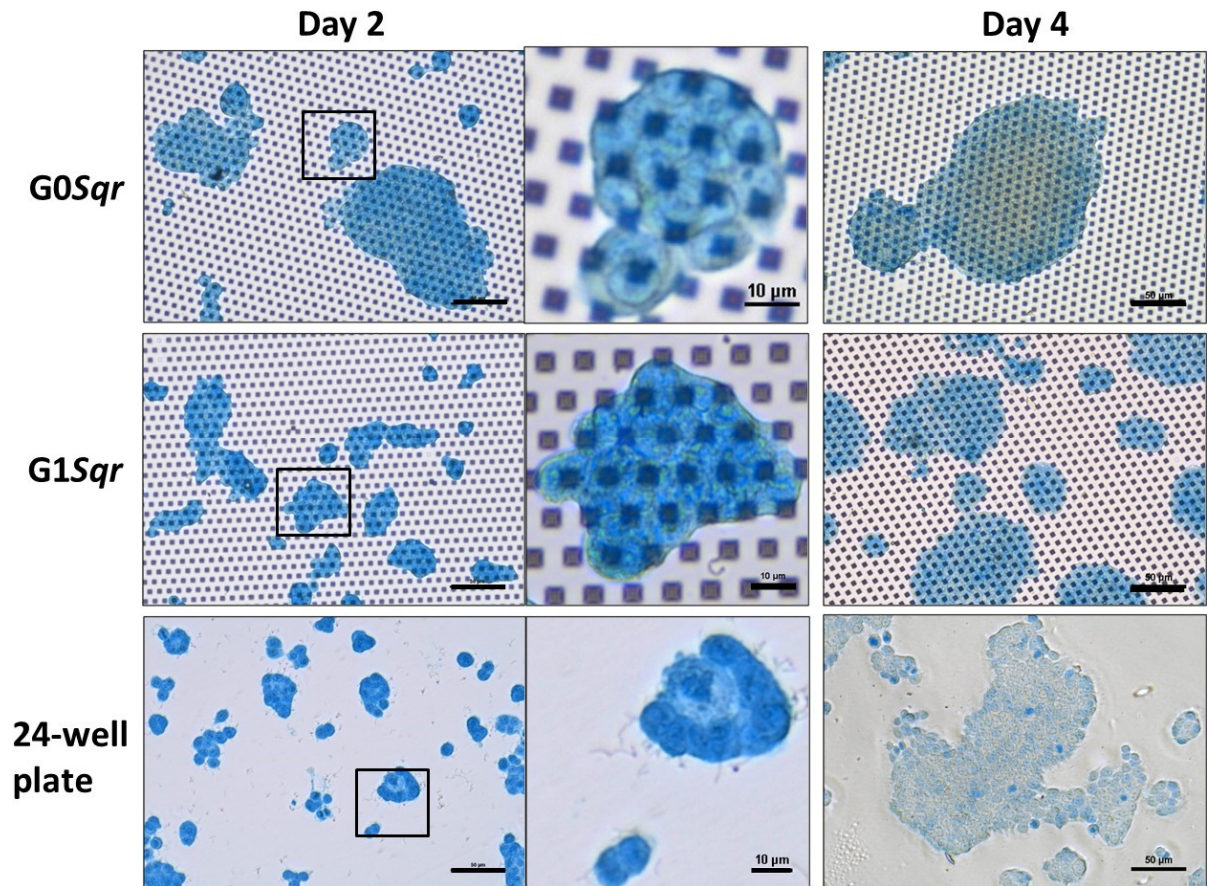

**Figure S4.** Light microscopic images of Methacarn-fixed and Alcian blue-stained HT29 cells on day 2 and 4. The images in the middle row are the magnification of the islands in the frames in the images on day 2. Scale bars (day 2, 4): 50 μm. Scale bar (magnification): 10 μm.

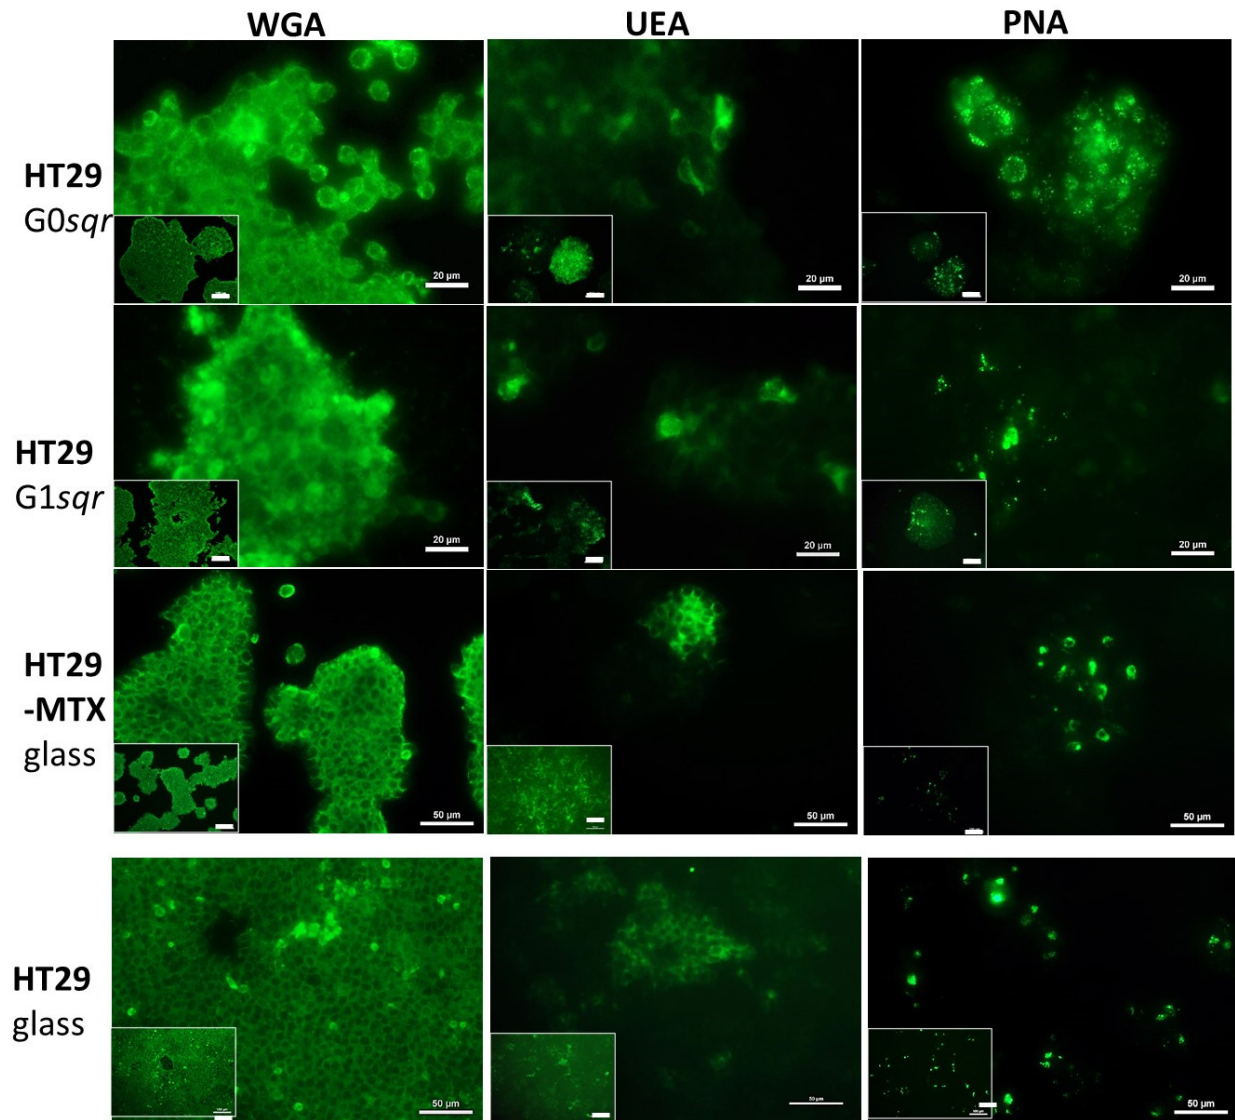

**Figure S5.** Epifluorescence of HT29 as well as HT29-MTX cells on different substrates stained with FITC-lectins (UEA- *Ulex Europaeus* agglutinin; WGA-Wheat Germ agglutinin, PNA-Peanut agglutinin). Scale bar (inset): 100µm. Scale bar (upper 2 panels): 20 µm; (lower 2 panels): 50 µm.

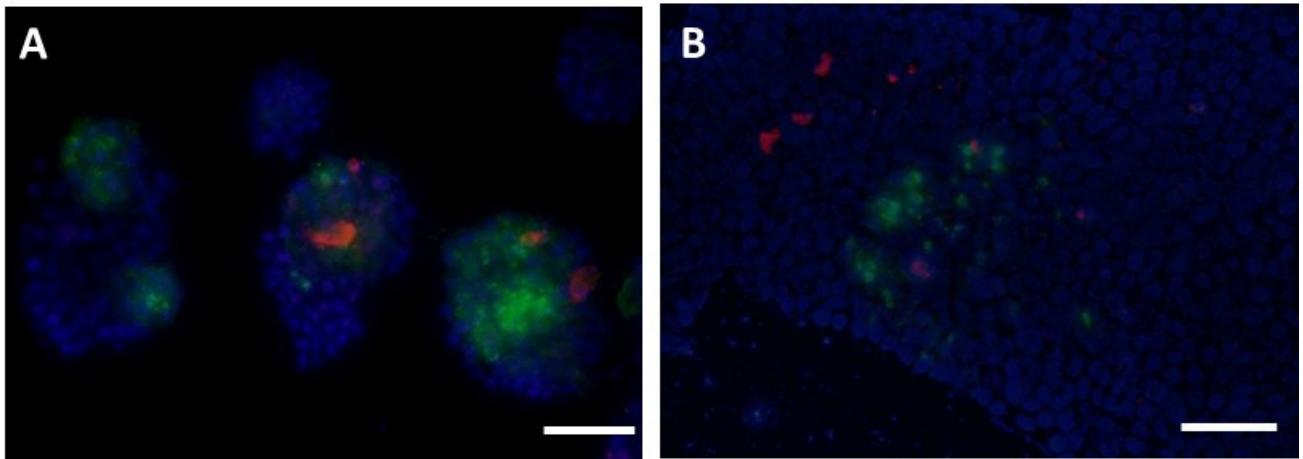

**Figure S6.** Immunofluorescence images of co-localization experiment of glycans with goblet or Paneth cells. (A) Immunofluorescence image of HT29 cells grown for 8 days on G1 topographic surfaces. The nucleus is stained by DAPI (blue), FITC-UEA for MUC2 (green), and TRITC-labeled secondary antibodies against MUC2 antibodies (red). (B) Immunofluorescence images of HT29-MTX cells grown for 11 days in traditional 2D culture. The nucleus is stained by DAPI (blue), Figure 1. *N*-acetylgalactosamine $\alpha$  (green), and TRITC-labeled secondary antibodies against lysozyme antibodies (red). Scale bars: 50  $\mu$ m.

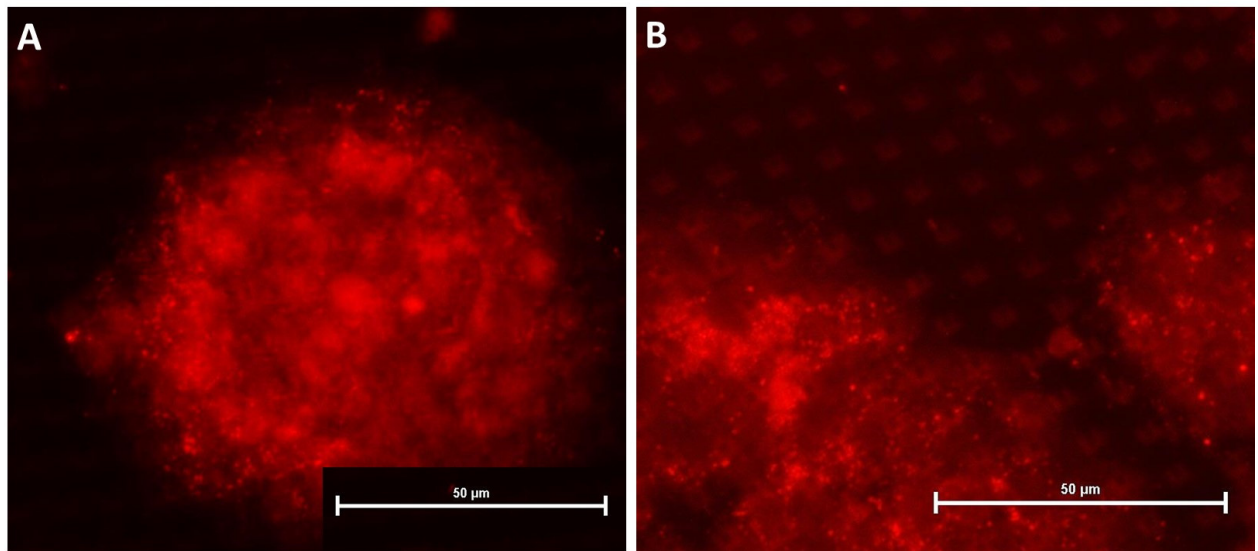

**Figure S7.** Magnified images of cell clusters on topographic surfaces immunostained for lysozyme. Epifluorescence of HT29 after 8 days on (A) G0Hex and (B) G1Hex stained with an antibody for lysozyme and a secondary TRITC-labeled antibody. Scale bar: 50  $\mu$ m.
